# Supplementary material
Source: MDPI journal article supplement (https://www.mdpi.com/1999-4907/12/8/1117)
Supplement: s1 [file s1 › forests-1319547-supplementary.pdf]

**Table S1** Conversions of root point data from 3D laser scanner to scale based on the relationships in the coordinates or diameter of roots between manual measurement data ( $x_m, y_m, z_m, d_m$ ) and 3D laser scanner measurement data ( $x_{3D}, y_{3D}, z_{3D}, d_{3D}$ ).

|                 | Root system 1                      | Root system 2                      |
|-----------------|------------------------------------|------------------------------------|
| $x$ -coordinate | $x_{1m} = -5.111 x_{13D} + 1328.6$ | $x_{2m} = -8.020 x_{23D} + 2066.9$ |
| $y$ -coordinate | $y_{1m} = -5.043 y_{13D} + 1293.8$ | $y_{2m} = -6.054 y_{23D} + 2227.2$ |
| $z$ -coordinate | $z_{1m} = 5.219 z_{13D} - 99.6$    | $z_{2m} = 9.920 z_{23D} - 211.32$  |
| Diameter        | $d_{1m} = 4.889 d_{13D} - 5.12$    | $d_{2m} = 6.465 d_{23D} - 12.22$   |

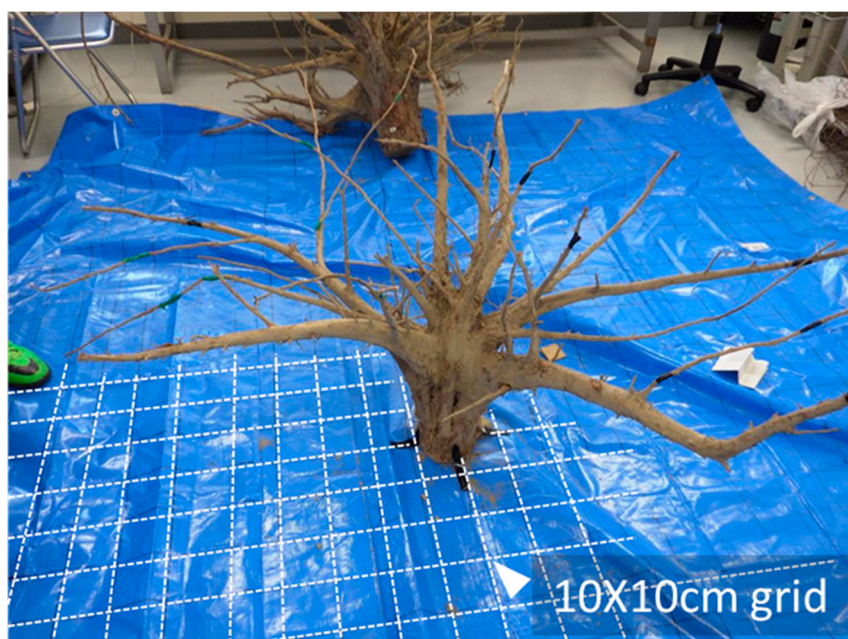

**Figure S1.** How we measured the root system by hand against a 100 mm  $\times$  100 mm grid. This photo shows *Cryptomeria japonica*.

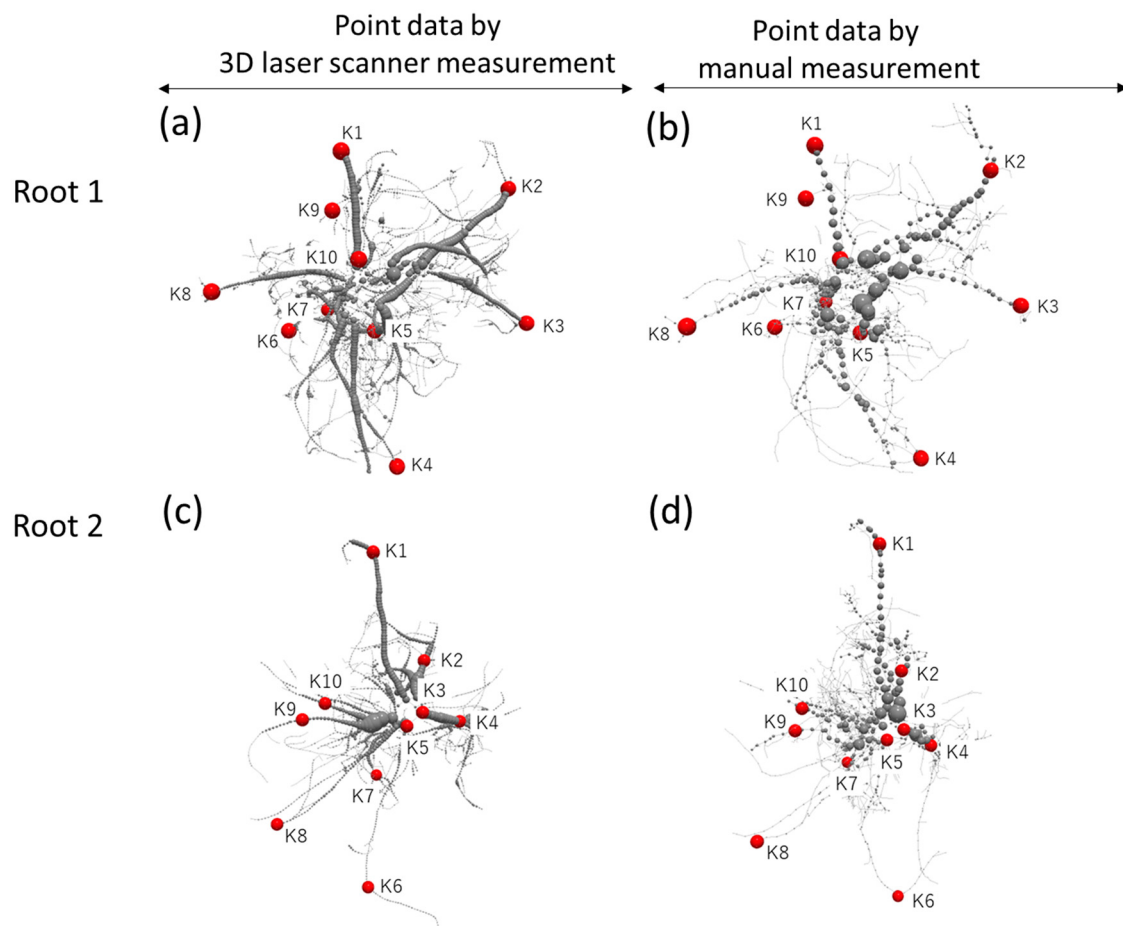

**Figure S2.** Positions of 10 points (K1–K10) set to relate locations of roots to actual scale.

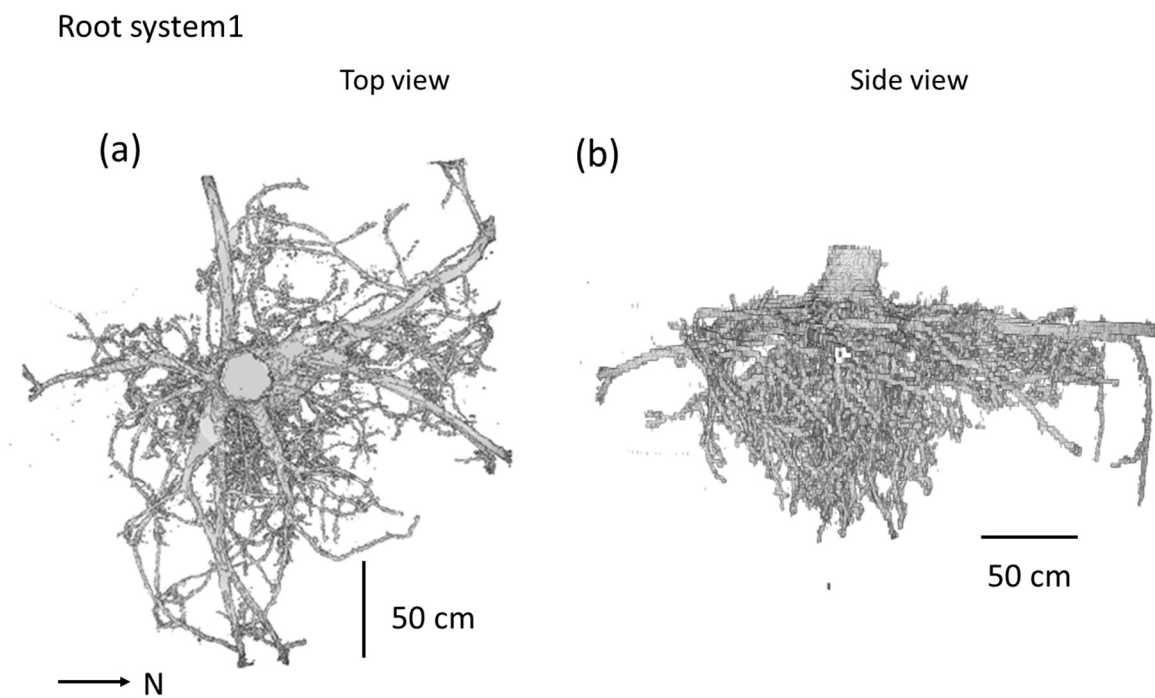

**Figure S3.** (a) Top and (b) side views of root system 1 drawn from point cloud data collected by 3D laser scanner. These are the same as Fig. 3 (A, a) but enlarged.

Root system 2

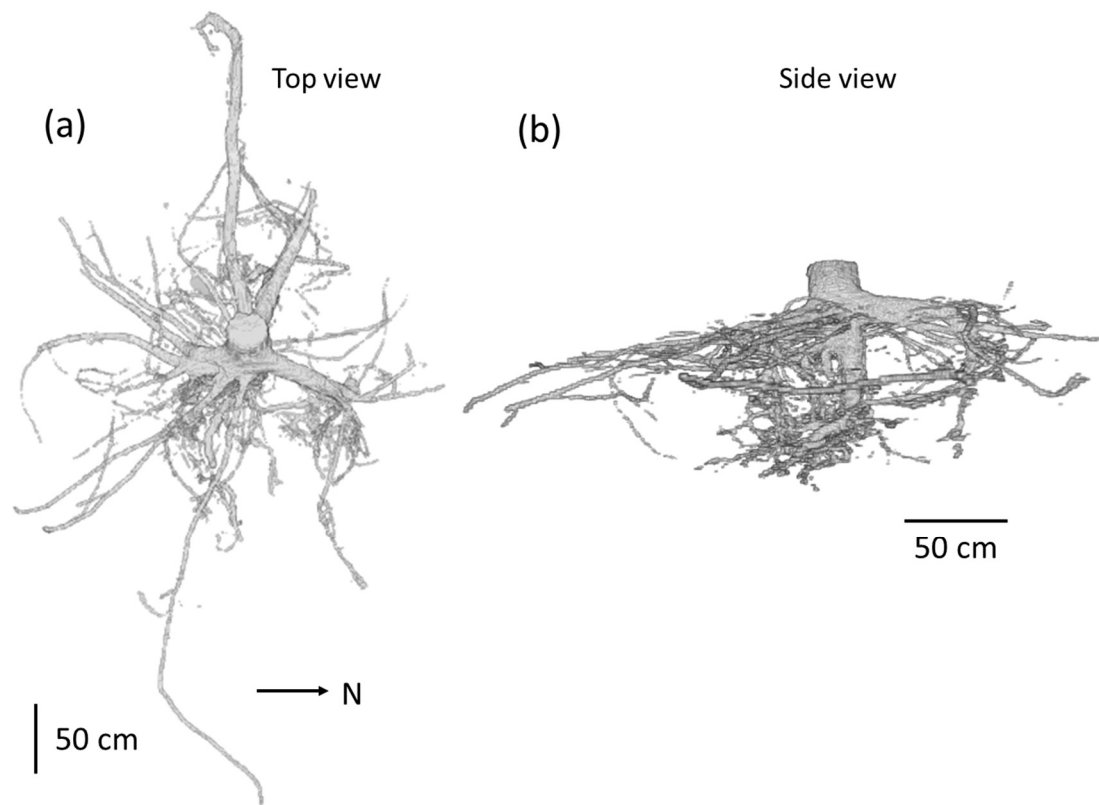

**Figure S4.** (a) Top and (b) side views of Root system 2 drawn from point cloud data collected by 3D laser scanner. These are the same as Fig. 4 (A, a) but enlarged.
